# Supplementary material for: ONETOOL for the analysis of family-based big data
Source: Oxford University Press journal article supplement (doi:10.1093/bioinformatics/bty180), 2018-03-26
Supplement: bioinformatics_34_16_2851_s1.pdf [file bioinformatics_34_16_2851_s1.pdf]

# ONETOOL for the analysis of family-based big data –

## Supplementary material

Yeunjoo E. Song<sup>1†</sup>, Sungyoung Lee<sup>2†</sup>, Kyungtaek Park<sup>2</sup>, Robert C. Elston<sup>1</sup>, Hyeon-Jong Yang<sup>3,4\*</sup>  
and Sungho Won<sup>2,5,6\*</sup>

<sup>1</sup> Department of Population and Quantitative Health Sciences, Case Western Reserve University, Cleveland, OH, USA.

<sup>2</sup> Interdisciplinary Program of Bioinformatics, Seoul National University, Seoul, South Korea

<sup>3</sup> SCH Biomedical Informatics Research Unit, Soonchunhyang University Seoul Hospital, Seoul, Korea

<sup>4</sup> Pediatric Allergy and Respiratory Center, Department of Pediatrics, Soonchunhyang University Seoul Hospital, Soonchunhyang University College of Medicine, Seoul, Korea

<sup>5</sup> Department of Public Health Science, Graduate School of Public Health, Seoul National University, Seoul, Korea

<sup>6</sup> Institute of Health and Environment, Seoul National University, Seoul, South Korea

† Contributed equally

\*Correspondence:

Sungho Won, Ph.D.  
Department of Public Health Science  
Graduate School of Public Health  
Seoul National University  
Seoul, Korea  
[sunghow@gmail.com](mailto:sunghow@gmail.com)

Hyeon Jong Yang, MD, Ph.D.  
Department of Pediatrics  
Soonchunhyang University Seoul Hospital  
Soonchunhyang University College of Medicine  
Seoul, Korea  
[pedyang@schmc.ac.kr](mailto:pedyang@schmc.ac.kr)

**Table 1. Available tools for family-based sequence data analysis.**

| Name                 | 1 | 2 | 3 | 4 | 5 | 6 | 7 | 8 | 9 | 10 | 11 | 12 | Reference                 |
|----------------------|---|---|---|---|---|---|---|---|---|----|----|----|---------------------------|
| <i>Olorin</i>        |   | √ |   | √ |   |   |   |   |   |    |    |    | Morris et al. (2012)      |
| <i>VAR-MD</i>        |   | √ |   |   |   |   |   |   |   |    |    |    | Sincan et al. (2012)      |
| <i>PEDCMC</i>        |   |   |   |   |   |   |   |   | √ |    |    |    | Zhu and Xiong (2012)      |
| <i>Mendel</i>        | √ | √ | √ |   |   | √ |   | √ | √ |    |    |    | Lange et al. (2013)       |
| <i>famBT/famSKAT</i> |   |   |   |   |   |   |   |   | √ |    |    |    | Chen et al. (2013)        |
| <i>FB-SKAT</i>       |   |   |   |   |   |   |   |   | √ |    |    |    | Ionita-Laza et al. (2013) |
| <i>PEDGENE</i>       |   |   |   |   |   |   |   |   | √ |    |    |    | Schaid et al. (2013)      |
| <i>FARVAT</i>        |   |   |   |   |   |   |   |   | √ |    |    |    | Choi et al. (2014)        |
| <i>MendelScan</i>    |   | √ |   |   |   | √ | √ |   |   |    |    |    | Koboldt et al. (2014)     |
| <i>FamAnn</i>        |   | √ |   |   |   |   |   |   |   |    |    |    | Yao et al. (2014)         |
| <i>pVAAST</i>        |   | √ |   |   |   |   |   | √ | √ |    |    |    | Hu et al. (2014)          |
| <i>rvTDT</i>         |   |   |   |   |   |   |   |   | √ |    |    |    | Jiang et al. (2014)       |
| <i>RarePedSim</i>    | √ |   |   |   |   |   |   |   |   |    |    |    | Li et al. (2015)          |
| <i>PBAP</i>          |   | √ | √ |   |   |   |   |   |   |    |    |    | Nato et al. (2015)        |
| <i>F-SKAT</i>        |   |   |   |   |   |   |   |   | √ |    |    |    | Yan et al. (2015)         |
| <i>SEQLINAKGE</i>    |   |   |   |   |   |   |   | √ |   |    |    |    | Wang et al. (2015)        |
| <i>FamPipe</i>       |   | √ |   |   |   |   | √ |   |   |    |    |    | Chung et al. (2016)       |
| <i>FCVPP</i>         |   | √ |   |   |   | √ |   |   |   |    |    |    | Forsti et al. (2016)      |
| <i>RVTESTS</i>       |   | √ |   |   |   |   |   |   | √ | √  |    |    | Zhan et al. (2016)        |
| <i>RV-GDT/RV-PDT</i> |   |   |   |   |   |   |   |   | √ |    |    |    | He et al. (2017)          |
| <i>Merlin</i>        |   |   |   |   |   |   |   |   |   |    | √  |    | Burdick et al. (2006)     |
| <i>GIGI</i>          |   |   |   |   |   |   |   |   |   |    | √  |    | Cheung et al. (2013)      |
| <i>PedBLIMP</i>      |   |   |   |   |   |   |   |   |   |    | √  |    | Chen et al. (2014)        |
| <i>PRIMAL</i>        |   |   |   |   |   |   |   |   |   |    | √  |    | Livine et al. (2015)      |
| <i>GIGI-Quick</i>    |   |   |   |   |   |   |   |   |   |    | √  |    | Kunji et al. (2018)       |

1: design/simulation, 2: variant QC/filtering/ranking/annotation, 3: pedigree description/summary, 4: pedigree plot, 5: familial aggregation, 6: segregation, 7: IBD mapping, 8: linkage, 9: association (genotype), 10: meta-analysis, 11: family-based imputation, 12: association (dosage)

**Table 2. Analyses available in ONETOOL.**

| Main                 | Sub-category           | Detail                                                                             | Reference and software                                                                                                         |
|----------------------|------------------------|------------------------------------------------------------------------------------|--------------------------------------------------------------------------------------------------------------------------------|
| InfoQC analysis      | Variant Information    | $F_{ST}$ , $Ts/Tv$ ratio, MAF, HWE, PCA                                            |                                                                                                                                |
|                      | Sample Information     | Het, Het/Hom                                                                       |                                                                                                                                |
|                      | Pedigree Information   | Description and summary, plot, relative pairs                                      | S.A.G.E. (2016) – PEDINFO<br>Sinnwell et al. (2014) – kinship2<br>Song and Elston (2013) – PEDWIZ                              |
|                      | Error Detection        | Mendelian error                                                                    |                                                                                                                                |
|                      | Relatedness matrix     | Kinship, IBS, GRM                                                                  | Balding and Nichols (1995)                                                                                                     |
| Trait Analysis       | Familial Aggregation   | Correlation                                                                        | S.A.G.E. (2016) - FCOR                                                                                                         |
|                      | Heritability           | Based on Kinship, IBS, GRM                                                         |                                                                                                                                |
|                      | Segregation Analysis   | Mode of inheritance                                                                | S.A.G.E. (2016) - SEGREG                                                                                                       |
| Linkage Analysis     | Model-based            | Two-point, utilizing segregation analysis                                          | S.A.G.E. (2016) - LODLINK                                                                                                      |
|                      | Model-free             | Multipoint, modeling LD                                                            | Abecasis et al (2002) - MERLIN                                                                                                 |
| Association Analysis | Single variant         | Generalized Score test, regression <sup>+</sup> , Fisher's exact test <sup>+</sup> |                                                                                                                                |
|                      |                        | Transmission disequilibrium test – TDT, SDT                                        | Spielman et al. (1993)<br>Spielman and Ewens (1998)                                                                            |
|                      |                        | Likelihood ratio test – MQLS, FQLS, E(xtendedF)QLS                                 | Thornton and McPeck (2007)<br>Park et al. (2015)<br>Won et al. (2015)                                                          |
|                      |                        | Linear mixed model method - GEMMA                                                  | Zhou and Stephens (2012)                                                                                                       |
|                      | Gene-based             | CMC - no weight (default) Collapsing                                               | Li and Leal (2008)<br>Morris and Zeggini (2010)                                                                                |
|                      |                        | Burden test – PEDCMC, wSum <sup>+</sup> , aSum <sup>+</sup>                        | Madsen and Browning (2009)<br>Han and Pan (2010)<br>Zhu and Xiong (2012)                                                       |
|                      |                        | Variable threshold method – famVT, VT <sup>+</sup>                                 | Price et al. (2010)                                                                                                            |
|                      |                        | Kernel method – FARVAT, KBAC <sup>+</sup> , SKAT <sup>+</sup> , SKATO <sup>+</sup> | Liu and Leal (2010)<br>Wu et al. (2011)<br>Lee et al. (2012)<br>Choi et al. (2014)<br>Wang et al. (2016)<br>Choi et al. (2016) |
|                      |                        | Burden & Kernel - PEDGENE                                                          | Schaid et al. (2013)                                                                                                           |
|                      | Epistasis <sup>+</sup> | MDR <sup>+</sup> , GMDR <sup>+</sup>                                               |                                                                                                                                |

**$F_{ST}$** : fixation index,  **$Ts/Tv$** : transition and transversion ratio, **MAF**: minor allele frequency, **HWE**: Hardy–Weinberg Equilibrium, **PCA**: principle component analysis, **Het/Hom**: heterozygote and homozygote ratio, **IBS**: identity by state, **GRM**: genetic relation matrix, **LD**: linkage disequilibrium

Note:

- Both binary and quantitative variables can be analyzed in trait analysis and linkage analysis, both as main traits and as covariates. For heritability estimation of binary variable, ONETOOL first estimates the heritability by assuming the binary trait is a quantitative trait and then the heritability of its liability is estimated on the logistic scale (Lee et al., 2011). Therefore, the estimated heritability of a dichotomized existing quantitative variable should be understood as being measured on the logistic scale.
- The additional association analysis methods available for the independent samples are marked with <sup>+</sup>.

**Table 3. The variable type and covariate support in association analyses in ONETOOL.**

|                                                    |             | Trait type |            | Covariate | Family data structure | Note                                                                                                                      |
|----------------------------------------------------|-------------|------------|------------|-----------|-----------------------|---------------------------------------------------------------------------------------------------------------------------|
|                                                    |             | binary     | continuous |           |                       |                                                                                                                           |
| Single variant analysis (suitable for common SNPs) | Score test* | N          | Y          | Y         | general pedigree      | usually efficient for randomly selected samples                                                                           |
|                                                    | TDT         | Y          | N          | N         | trio                  | parental genotype need to be known but not used                                                                           |
|                                                    | SDT         | Y          | N          | N         | nuclear family        | need the genotype data of unaffected sibs                                                                                 |
|                                                    | MQLS        | Y          | N          | N         | general pedigree      | efficient for ascertained families                                                                                        |
|                                                    | FQLS        | Y          | Y          | N         | general pedigree      | efficient for ascertained families                                                                                        |
|                                                    | GEMMA*      | N          | Y          | Y         | general pedigree      | usually efficient for randomly selected samples                                                                           |
|                                                    | EQLS*       | Y          | Y          | Y         | general pedigree      | efficient for ascertained families                                                                                        |
| Gene-based analysis (suitable for rare variants)   | CMC*        | Y          | Y          | N         | general pedigree      | efficient when effects of rare variants are homogeneous                                                                   |
|                                                    | PEDCMC*     | Y          | N          | N         | general pedigree      | efficient when effects of rare variants are homogeneous                                                                   |
|                                                    | FAMVT*      | N          | Y          | N         | general pedigree      | efficient if rarer variants have stronger effect on disease                                                               |
|                                                    | FARVAT*     | Y          | Y          | Y         | general pedigree      | robust to the heterogeneity of effects of rare variants                                                                   |
|                                                    | PEDGENE*    | Y          | Y          | Y         | general pedigree      | conditioning on phenotypes, treating the genotype data random, for pedigrees sampled because of multiple affected members |
|                                                    | FBSKAT      | Y          | N          | N         | general pedigree      | efficient if rare variants with both positive and negative effect on disease are grouped to a single set                  |
|                                                    | RVTDT       | Y          | N          | N         | trio                  | efficient if rare variants with both positive and negative effect on disease are grouped to a single set                  |

Note:

The association analysis methods marked with \* can utilize the dosage data.

**Table 4. Recommended association analysis method for different types of data.**

| Trait Type                 |       | Heritability                                                                                                                                                                                                                                                                                                                                 |                                                                                                                                                                                                                                                                                               |
|----------------------------|-------|----------------------------------------------------------------------------------------------------------------------------------------------------------------------------------------------------------------------------------------------------------------------------------------------------------------------------------------------|-----------------------------------------------------------------------------------------------------------------------------------------------------------------------------------------------------------------------------------------------------------------------------------------------|
|                            |       | Small or zero (<0.3)                                                                                                                                                                                                                                                                                                                         | Large(>0.3)                                                                                                                                                                                                                                                                                   |
| Continuous trait           |       | <ul style="list-style-type: none"> <li>• Random sample               <ul style="list-style-type: none"> <li>- Logistic regression with/without PC scores depending on the presence of population structure</li> </ul> </li> <li>• Family-based sample               <ul style="list-style-type: none"> <li>- GEMMA</li> </ul> </li> </ul>    | <ul style="list-style-type: none"> <li>• Random sample               <ul style="list-style-type: none"> <li>- GEMMA</li> </ul> </li> <li>• Family-based sample               <ul style="list-style-type: none"> <li>- GEMMA</li> </ul> </li> </ul>                                            |
| Prevalence of binary trait | Small | <ul style="list-style-type: none"> <li>• Random sample               <ul style="list-style-type: none"> <li>- Logistic regression with/without PC scores depending on the population substructures</li> </ul> </li> <li>• Family-based sample               <ul style="list-style-type: none"> <li>- FARVAT/MQLS/FQLS</li> </ul> </li> </ul> | <ul style="list-style-type: none"> <li>• ascertained family / trio               <ul style="list-style-type: none"> <li>- TDT/SDT</li> </ul> </li> <li>• ascertained family / general pedigree               <ul style="list-style-type: none"> <li>- FARVAT/MQLS/FQLS</li> </ul> </li> </ul> |
|                            | Large | <ul style="list-style-type: none"> <li>• Independent sample               <ul style="list-style-type: none"> <li>- survival analysis / age-of-onset analysis</li> </ul> </li> </ul>                                                                                                                                                          | <ul style="list-style-type: none"> <li>• Ascertained family / trio               <ul style="list-style-type: none"> <li>- Age-of-onset analysis</li> </ul> </li> </ul>                                                                                                                        |

## **Text 1. Input and Output**

ONETOOL supports two different sets of input files, a PLINK set and a VCF set. The PLINK set consists of three files (i.e., .fam, .bed, and .bim) that are used to run PLINK, and the VCF set consist of a plink format family file (.fam) and a Variant Call Format (.vcf). The additional phenotypes and covariates are supported through an optional input file (.pheno) for both sets of input files. ONETOOL also support two different ways to specify the desired analysis options, through a command line and a script file. Each method in ONETOOL outputs the result file with the appropriate extension, so that the user can recognize it easily. It has the familiar user interface and the same or similar analysis option names as the existing tools, so no, or only a minimal, learning curve is needed.

## Text 2. Imputation

ONETOOL provides an option to impute the missing genotypes for typed genotypes. Expected missing genotypes for typed variants are imputed based on the familial relationship, and if phenotypes of any subjects with missing genotypes are available, genotypes imputed with family members' genotypes can improve statistical power. Let  $m_i$  and  $m'_i$  be the vector of subjects with observed genotypes and missing genotypes for the  $i^{\text{th}}$  variant, respectively. Then the observed genotypes of the  $i^{\text{th}}$  variant  $G_{im}$  can be estimated using the equation  $G_{im} = \Phi_{mm'}\Phi_{m'm'}^{-1}(G_{im'} - 2f_i) + 2f_i$ , where  $\Phi_{mm'}$  and  $\Phi_{m'm'}$  denote the relationship matrices between subjects with observed and missing genotypes, respectively, and  $f_i$  denotes minor allele frequency of the  $i^{\text{th}}$  variant.

The efficiency of the proposed method was evaluated with simulated data. We considered the pedigree that consists of 97 subjects (see Figure 1). Genotypes were selected from 1000 Genome Project and 100,000 variants were randomly selected. Then, MAFs for those 100,000 variants were calculated and founders' genotypes were randomly generated from binomial distribution under Hardy-Weinberg equilibrium. We assume there is no *de novo* mutation and non-founders' genotypes were randomly chosen with Mendelian transmission. Genotypes of all variants for 1%, 2%, 5%, 10% and 20% family members were randomly masked and then their genotypes were imputed using their relatives' genotypes. The dosage of the imputed genotypes shown in Figure 2 shows the accuracy of the imputed genotypes according to the MAF. Results show that the accuracy of imputed genotypes is up to 99% for rare variants, and imputed genotypes are reasonably accurate even with a substantial amount of missing data.

**Figure 1. Pedigree used for simulations.** This pedigree was randomly chosen from GAW19 data (Blangero et al., 2016).

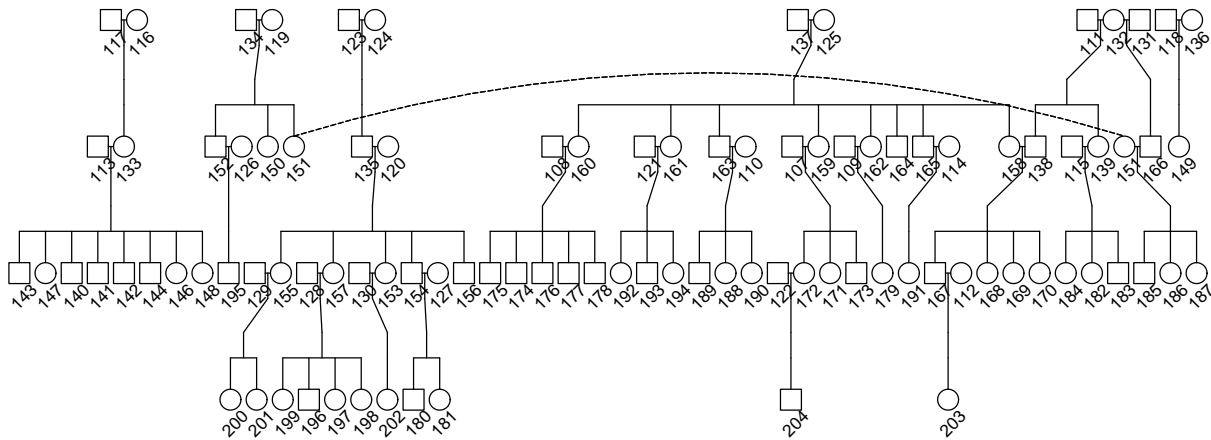

**Figure 2. Boxplots of imputed dosages.** Results were provided for various missing rates: (A) missing rate: 1%, (B) missing rate: 2%, (C) missing rate: 5%, (D) missing rate: 10%, (E) missing rate: 15%, and (F) missing rate: 20%. In each plot, three boxplots of imputed dosage for AA (homozygote major), Aa (heterozygote), and aa (homozygote recessive) are provided.

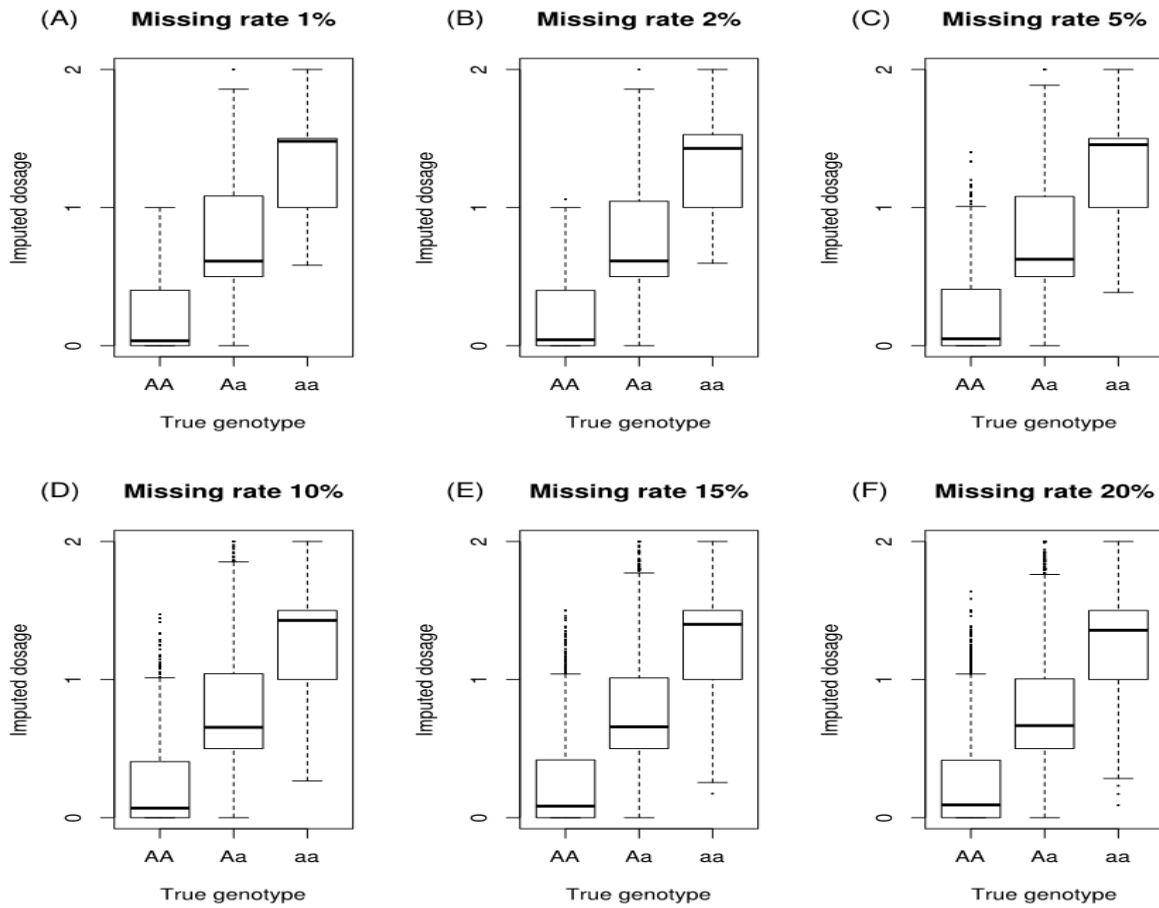



### Text 3. Association analysis with imputed genotypes

ONETOOL can take the dosage and genotype probability files from several popular imputation tools available for population data (Table 5). The list of statistical analyses which can utilize the dosage data is marked by \* in Table 1 above.

**Table 5. Dosage and genotype probability formats that are supported in ONETOOL.**

| File type                    | Impute toolset  | Extension          |
|------------------------------|-----------------|--------------------|
| Genotype probability formats | IMPTUE2         | .impute2           |
|                              | Beagle          | .bgl.gprobs        |
|                              | minimac3        | .vcf (version 4.3) |
| Dosage formats               | MACH (minimac2) | .mldose            |
|                              | Beagle          | .bgl.dose          |
|                              | minimac3        | .vcf (version 4.3) |

## Text 4. Performance Evaluation

ONETOOL is implemented in C++ to provide the best performance. It uses an R plugin for the pedigree plot functionality. A multi-thread option is available for various analyses with the '--thread' option. In Table 5 and 6, we show the performance of ONETOOL.

First, we compared the performance of ONETOOL to RVTESTS (Zhan et al., 2016) to evaluate speed. Though RVTESTS is not specifically designed for family-based data, it provides different association analysis methods that can accommodate both unrelated and related data, thus making a good comparison case for the performance of ONETOOL's association module.

For the dataset, we used chromosome 21 of GAW19 simulation dataset (Blangero et al., 2016). It contains 464 subjects with 191,664 variants. For the comparison of the gene-based analysis methods, we used the refFlat gene table for hg19 reference downloaded from their website. It provided the analysis of 302 genes consisting of 78,791 low-frequency variants. All analyses were conducted in a Linux workstation with four Intel E7-4850 CPUs and 1T RAM. For each method, the computation time was averaged over ten runs.

Table 6 shows the average time each analysis method took in ONETOOL and RVTESTS. ONETOOL consistently took less time to finish the analysis than RVTESTS, with up to around 200x acceleration folds, except for Balding-Nichols empirical kinship calculation.

**Table 6. Performance comparison between ONETOOL and RVTESTS.**

|                         |                     | RVTESTS | ONETOOL | Acceleration Folds |
|-------------------------|---------------------|---------|---------|--------------------|
| Univariate test         | Wald test           | 75      | 33      | 2.27               |
|                         | Fisher's Exact Test | 89      | 22      | 4.05               |
| Gene-level test         | CMC                 | 34      | 15      | 2.27               |
|                         | Collapsing test     | 34      | 15      | 2.27               |
|                         | SKAT                | 2,160   | 640     | 3.38               |
|                         | SKAT-o              | 87,981  | 404     | 217.77             |
|                         | KBAC                | 254     | 70      | 3.63               |
| Relatedness computation | VT                  | 356     | 270     | 1.32               |
|                         | GRM                 | 45      | 95      | 0.47               |
|                         | IBS                 | 82      | 42      | 1.95               |

(Unit: seconds, times)

Second, we evaluated the time to run several analyses in ONETOOL in two different family data sets. The first set (Data1) is the example data set available in our website. It consists of 10 simulated nuclear families and 100 variants. Each family contains 2 parents and 6 offsprings, so total 100 individuals. It is a complete data set, so genotyping rate is 100%. We ran ONETOOL analyzing the default binary trait included in .fam file. The second set (Data2) again is GAW19 real dataset. We analyzed a subset of families without any loops, so it contains 800 people from 12 pedigrees of size range 27 to 97. The total number of individuals is 800. We analyzed chromosome 21 again 12,842 SNPs and the genotyping rate is 66.94%. All analyses were conducted in a Linux server with four Intel Intel(R) Xeon(R) CPUs and 16G RAM. For each

method, the computation time was averaged over five runs. The run time each analysis took is shown in Table 7. Note that the last column indicates which analyses are included into the results shown in Table 2 of the main manuscript.

**Table 7. Run time of each analysis in ONETOOL (in second).**

| Type                                | Method       | Data1  | Data2     | Evaluated |
|-------------------------------------|--------------|--------|-----------|-----------|
| InfoQC analysis                     | freq         | 0.245  | 2.069     | +         |
|                                     | hwe          | 0.192  | 2.191     | +         |
|                                     | pca 5        | 0.219  | 3.678     | +         |
|                                     | het          | 0.153  | 2.175     | +         |
|                                     | hethom       | 0.208  | 2.136     | +         |
|                                     | mendel       | 0.223  | 2.25      | +         |
|                                     | pedinfo      | 0.099  | 0.224     | +         |
|                                     | relpair      | 0.256  | 1.063     | +         |
|                                     | famunq       | 0.165  | 0.304     | +         |
| Trait Analysis                      | fcor         | 0.301  | 39.289    | +         |
|                                     | heritability | 0.151  | 0.452     | +         |
|                                     | makecor      | 0.275  | 2.447     | +         |
|                                     | segreg       | 7.714  | 42.522    |           |
| Linkage Analysis                    | lodlink      | 27.613 | 12711.080 |           |
|                                     | merlin       | 0.196  | *         |           |
| Single variant association analysis | scoretest    | NA     | 7.129     |           |
|                                     | tdt          | 0.367  | NA        |           |
|                                     | sdt          | 0.209  | NA        |           |
|                                     | mqls         | 0.230  | NA        |           |
|                                     | fqls         | 0.501  | 7.809     |           |
|                                     | gemma        | NA     | 11.905    |           |
|                                     | multifqls    | 0.195  | 2.908     | +         |
| Gene-based association analysis     | collapsing   | 3.319  | 2.873     |           |
|                                     | pedcmc       | 0.259  | NA        |           |
|                                     | famvt        | NA     | 35.354    |           |
|                                     | farvat       | 0.234  | 3.365     | +         |
|                                     | pedgene      | 0.368  | 5.183     |           |
|                                     | fbskat       | 0.421  | NA        |           |
|                                     | rvt dt       | 16.163 | NA        |           |

**NA:** Not applicable, **\***: were too big to run by Merlin, **+**: included in the run time evaluation

## Text 5. Discussion

The advantages of family-based genetic studies have been emphasized by the ample amount of literatures and researchers (Ott et al., 2011, Clerget-Darpoux and Elston, 2007; Stein and Elston, 2009, Bailey-Wilson and Wilson, 2011; Wijsman, 2012). The importance of family-based designs has been repeatedly stressed for analyses with sequence data because of the genetic homogeneity between family members (Laird and Lange, 2006). Family study designs provide not only the enrichment of genetic loci containing rare variants, but also methods to control for genetic heterogeneity and population stratification.

As next generation sequence (NGS) data become more and more readily available for genetic and genomic analyses, the need for tools to integrate the various sources and analyze the vast amount of data is inevitable. This need has led to a plethora of such tools already developed and used, as reported in Pabinger et al. (2014). They surveyed 205 such tools for whole-genome/whole-exome sequencing data analysis and reported 32 selected tools. However, most of them are designed for analyzing population-based NGS data, not for family-based data.

We developed a novel tool, ONETOOL, to fill that gap and pipeline the genetic analysis process for pedigree data. It is designed to be as convenient as PLINK, as versatile as S.A.G.E., and as fast as Merlin. Input files for ONETOOL have the most popularly used format, so users familiar with how to use PLINK can easily use ONETOOL without much of a learning curve. Also, the outputs from the S.A.G.E. and Merlin modules are in the same as the original formats, which makes the comparison and the interpretation of results much easier for the many users who are already familiar with those tools. As pointed out by Eu-Ahsunthornwattana et al. (2014), the choice of analysis tool is often made on the basis of speed and convenience, given the strong concordance between the results from the different approaches and implementations in the different tools. In that respect, ONETOOL stands out among other tools as it is specifically designed to provide speed and convenience.

More time took to calculate GRM by ONETOOL than by RVTESTS. This seems to be due to the different approach each program is taking to process the genotype data while reading in a VCF file. In ONETOOL, all genotypes are pre-loaded before any analysis begins while RVTESTS reads in the VCF file sequentially, line by line for each variant, and processes to calculate the GRM. The sequential approach has less I/O burden, so provides the faster calculation for the GRM itself compare to the pre-load approach. However, the sequential approach has the major disadvantages in the down-road analyses. First, it is very limited for any sample-wise analyses. Second, it is computationally very inefficient for any gene-level analyses because the I/O pattern becomes random. The pre-load approach in ONETOOL provides the computational efficiency and the superiority in the rare-variant analysis.

Currently, ONETOOL can be used to analyze the genetic data with bi-allelic variants for the association analyses. For the loci with more than 2 variants will be automatically filtered and reported in the log file it automatically generates for every run.

Though this initial version of ONETOOL implements many different analysis methods for analyzing family data, there are many more. With a modular design, each analysis module within ONETOOL is independent of the others, so it is very easy to extend and add more tools.

## References

- Abecasis GR, Cherny SS, Cookson WO, Cardon LR (2002) Merlin-rapid analysis of dense genetic maps using sparse gene flow tree. *Nat Genet* 30:97–101.
- Bailey-Wilson JE, Wilson AF (2011) Linkage analysis in the next generation sequencing era. *Hum Hered* 72:228–236.
- Balding DJ, Nichols RA (1995) A method for quantifying differentiation between populations at multi-allelic loci and its implications for investigating identity and paternity. *Genetica* 96:3–12.
- Blangero J, Teslovich TM, Sim X, Almeida MA, Jun G, Dyer TD, Johnson M, Peralta JM, Manning AK, Wood AR, et al. (2016) Omics squared: Human genomic, transcriptomic, and phenotypic data for Genetic Analysis Workshop 19. *BMC Proc* 9 Suppl 7:S20.
- Burdick JT, Chen WM, Abecasis GR, Cheung VG (2006) In silico method for inferring genotypes in pedigrees. *Nat Genet* 38(9):1002-1004.
- Chen H, Meigs JB, Dupuis J. (2012) Sequence kernel association test for quantitative traits in family samples. *Genet Epidemiol* 37(2):196–204.
- Chen W, Schaid DJ. 2012. PedBLIMP: Extending Linear Predictors to Impute Genotypes in Pedigrees. *Genet Epidemiol* 37(2):196–204.
- Choi S, Lee S, Cichon S, Nöthen MM, Lange C, Park T, Won S (2014) FARVAT: a family-based rare variant association test. *Bioinformatics* 30:3197–3205.
- Choi S, Lee S, Qiao D, Hardin M, Cho MH, Silverman EK, Park T, Won S (2016) FARVATX: Family-Based Rare Variant Association Test for X-Linked Genes. *Genet Epidemiol*. 40(6):475-85.
- Cheung, C.Y. et al. (2013) GIGI: an approach to effective imputation of dense genotypes on large pedigrees. *Am. J. Hum. Genet.*, 92, 504–516.
- Chung RH, Tsai WY, Kang CY, Yao PJ, Tsai HJ, Chen CH (2016) FamPipe: An Automatic Analysis Pipeline for Analyzing Sequencing Data in Families for Disease Studies. *PLoS Comput Biol* 12(6):e1004980.
- Clerget-Darpoux F, Elston RC (2007) Are linkage analysis and the collection of family data dead? Prospects for family studies in the age of genome-wide association. *Hum Hered* 64:91–96.
- Eu-Ahsunthornwattana J, Miller EN, Fakiola M, Wellcome Trust Case Control Consortium 2, Jeronimo SM, Blackwell JM, Cordell HJ (2014) Comparison of methods to account for relatedness in genome-wide association studies with family-based data. *PLoS Genet*.10:e1004445.
- Falconer DS (1965) Inheritance of liability to certain diseases estimated from incidence among relatives. *Ann Hum Genet* 29:51–76.

- Försti A, Kumar A, Paramasivam N, Schlesner M, Catalano C, Dymerska D, ... Hemminki K (2016). Pedigree based DNA sequencing pipeline for germline genomes of cancer families. *Hered Cancer Clin Pract*, 14:16. Doi:10.1186/s13053-016-0058-1.
- Gazal S, Gosset S, Verdura E, Bergametti F, Guey S, Babron MC, Tournier-Lasserre E (2016). Can whole-exome sequencing data be used for linkage analysis? *Eur J Hum Genet* 24:581-586.
- Han F, Pan W (2010) A Data-Adaptive Sum Test for Disease association with multiple common or rare variants. *Hum Hered* 70:42–54.
- He Z, Zhang D, Renton AE, Li B, Zhao L, Wang GT, Goate AM, Mayeux R, Leal SM (2017). The Rare-Variant Generalized Disequilibrium Test for Association Analysis of Nuclear and Extended Pedigrees with Application to Alzheimer Disease WGS Data. *Am J Hum Genet* 100:193-204.
- Hu H, Roach JC, Coon H, Guthery SL, Voelkerding KV, Margraf RL, Durtschi JD, Tavtigian SV, Shankaracharya, Wu W, Scheet P, Wang S, Xing J, Glusman G, Hubley R, Li H, Garg V, Moore B, Hood L, Galas DJ, Srivastava D, Reese MG, Jorde LB, Yandell M, Huff CD (2014). A unified test of linkage analysis and rare-variant association for analysis of pedigree sequence data. *Nat Biotechnol* 32:663-669
- Jiang D, McPeck MS (2014). Robust Rare Variant Association Testing for Quantitative Traits in Samples with Related Individuals. *Genet Epidemiol* 38:10-20.
- Kim Y, Lee Y, Lee S, Kim NH, Lim J, Kim YJ, Oh JH, Min H, Lee M, Seo HJ, Lee SH, Sung J, Cho NH, Kim BJ, Han BG, Elston RC, Won S, Lee J (2015). On the estimation of heritability with family-based and population-based samples. *BioMed Res Int* 2015:671349.
- Koboldt DC, Larson DE, Sullivan LS, Bowne SJ, Steinberg KM, Churchill JD, Buhr AC, Nutter N, Pierce EA, Blanton SH, Weinstock GM, Wilson RK, Daiger SP (2014). Exome-based mapping and variant prioritization for inherited Mendelian disorders. *Am J Hum Genet* 94:373-384.
- Kong A, Cox NJ (1997) Allele-sharing models: LOD scores and accurate linkage tests. *Am J Hum Genet* 61:1179-1188.
- Kunji K, Ullah E, Nato AQ, Wijsman EM, Sadd M (2018). GIGI-Quick: a fast approach to impute missing genotypes in genome-wide association family data. *Bioinformatics* doi: 10.1093/bioinformatics/btx782.
- Laird NM, Lange C (2006). Family-based designs in the age of large-scale gene-association studies. *Nat Rev Genet* 7:385–394.
- Lange K, Papp JC, Sinsheimer JS, Sripracha R, Zhou H, Sobel EM (2013). Mendel: the Swiss army knife of genetic analysis programs. *Bioinformatics* 29:1568–1570.
- Lee S, Emond MJ, Bamshad MJ, Barnes KC, Rieder MJ, Nickerson DA; NHLBI GO Exome Sequencing Project—ESP Lung Project Team, Christiani DC, Wurfel MM, Lin X. (2012) Optimal Unified Approach for Rare-Variant Association Testing with Application to Small-Sample Case-Control Whole-Exome Sequencing Studies. *Am J Hum Genet* 91:224-237.

- Lee SH, Wray NR, Goddard ME, Visscher PM (2011). Estimating missing heritability for disease from genome-wide association studies. *Am J Hum Genet* 88:294-305.
- Li B, Leal SM (2008) Methods for detecting associations with rare variants for common diseases: application to analysis of sequence data. *Am J Hum Genet* 83:311-321.
- Li B, Wang GT, Leal SM (2015). Generation of sequence-based data for pedigree-segregating Mendelian or Complex trait. *Bioinformatics* 31:3706–3708.
- Liu DJ, Leal SM (2010) A novel adaptive method for the analysis of next-generation sequencing data to detect complex trait association rare variants due to gene main effects and interactions. *PLoS Genet* 6, e1001156.
- Livne OE, Han L, Alkorta-Aranburu G, Wentworth-Sheilds W, Abney M, Ober C, Nicolae DL (2015) PRIMAL: Fast and Accurate Pedigree-based Imputation from Sequence Data in a Founder Population. *PLOS ComBio* DOI:10.1371/journal.pcbi.1004139.
- Madsen BE, Browning SR (2009) A Groupwise Association Test for Rare Mutations Using a Weighted Sum Statistic. *PLoS Genet* 5:e1000384.
- Morris JA, Barrett JC (2012). Olorin: combining gene flow with exome sequencing in large family studies of complex disease. *Bioinformatics* 28:3320–3321.
- Morris AP, Zeggini E (2010). An evaluation of statistical approaches to rare variant analysis in genetic association studies. *Genet Epidemiol* 34:188–193.
- Nato AQ Jr., Chapman NH, Sohi HK, Nguyen HD, Brkanac Z (2015). PBAP: a pipeline for file processing and quality control of pedigree data with dense genetic markers. *Bioinformatics* 31:3790–3798.
- Ott J, Kamatani Y, Lathrop M (2011) Family-based designs for genome-wide association studies. *Nat Rev Genet* 12:465-474.
- Ott J, Wang L, Leal SM (2015) Genetic linkage analysis in the age of whole-genome sequencing. *Nat Rev Genet* 16:275-284.
- Pabinger S, Dander A, Fisher M, Snajder R, Sperk M, Efremova M, Krabichler B, Speicher MR, Trajanoski Z (2013) A survey of tools for variant analysis of next-generation genome sequencing data. *Briefings in Bioinformatics* 15:256-278.
- Park S, Lee S, Lee Y, Herold C, Hooli B, Mullin K, Park T, Park C, Bertram L, Lange C, Tanzi R, Won S (2015) Adjusting heterogeneous ascertainment bias for genetic association analysis with extended families. *BMC Med Genet* 16:62.
- Price AL, Kryukov GV, de Bakker PI, Purcell SM, Staples J, Wei LJ, Sunyaev SR (2010) Pooled association tests for rare variants in exon-resequencing studies. *Am J Hum Genet* 86:832-838.
- Purcell S, Neale B, Todd-Brown K, Thomas L, Ferreira MA, Bender D, Maller J, Sklar P, de Bakker PI, Daly MJ, Sham PC (2007) PLINK: a tool set for whole-genome association and population-based linkage analyses. *Am J Hum Genet* 81:559-575.

- S.A.G.E. 6.4 (2016) Statistical Analysis for Genetic Epidemiology <http://darwin.cwru.edu/sage/>.
- Schaid DJ, McDonnell SK, Sinnwell JP, Thibodeau SN (2013) Multiple genetic variant association testing by collapsing and kernel methods with pedigree or population structured data. *Genet Epidemiol* 37:409-418.
- Schnell AH, Sun X (2012) Model-based linkage analysis of a quantitative trait. *Methods Mol Biol* 850:263-283.
- Sincan M, Simeonov DR, Adams D, Markello TC, Pierson TM, Toro C, Gahl WA, Boerkoel CF (2012) VAR-MD: A Tool to Analyze Whole Exome–Genome Variants in Small Human Pedigrees with Mendelian Inheritance. *Hum Mutat* Apr;33(4):593-8. doi: 10.1002/humu.22034. Epub 2012 Feb 24.
- Sinnwell JP, Therneau TM, Schaid DJ (2014) The kinship2 R package for pedigree data. *Hum hered* 78:91-93.
- Song YE, Elston RC (2013) PedWiz: a web-based tool for pedigree informatics. *Front Genet* 4:189. 10.3389/fgene.2013.00189.
- Speed D, Balding DJ (2015) Relatedness in the post-genomic era: is it still useful? *Nat Rev Gen* 16:33–44.
- Spielman RS, Ewens WJ (1998) A Sibship Test for Linkage in the presence of association: the sib transmission/disequilibrium test. *Am J Hum Genet* 62:450-458.
- Spielman RS, McGinnis RE, Ewens WJ (1993) Transmission test for linkage disequilibrium: the insulin gene region and insulin-dependent diabetes mellitus (IDDM). *Am J Hum Genet* 52:506-516.
- Stein CM, Elston RC (2009) Finding genes underlying human disease. *Clin Genet* 75:101-106.
- Thornton T, McPeck MS (2007) Case-Control Association Testing with Related Individuals: A More Powerful Quasi-Likelihood Score Test. *Am J Hum Genet* 81:321-337.
- Wang GT, Zhang D, Li B, Dai H, Leal SM (2015) Collapsed haplotype pattern method for linkage analysis of next-generation sequence data. *Eur J Hum Genet* 23:1739-1743.
- Wang L, Lee S, Gim J, Qiao D, Cho M, Elston RC, Silverman EK, Won S. Family-Based Rare Variant Association Analysis: A Fast and Efficient Method of Multivariate Phenotype Association Analysis. *Genet Epidemiol*. 2016 Sep;40(6):502-11.
- Wijsman EM (2012) The role of large pedigrees in an era of high-throughput sequencing. *Hum Genet* 131:1555-1563.
- Won S, Kim W, Lee S, Lee Y, Sung J, Park T (2015) Family-based association analysis: a fast and efficient method of multivariate association analysis with multiple variants. *BMC Bioinformatics* 16:46.
- Wu MC, Lee S, Cai T, Li Y, Boehnke M, Lin X. (2011) Rare-variant association testing for sequencing data with the sequence kernel association test. *Am J Hum Genet* 89:82-93.



- Yan Q, Tiwari HK, Yi N, Gao G, Zhang K, Lin WY, Lou XY, Cui X, Liu N (2015) A Sequence Kernel Association Test for Dichotomous Traits in Family Samples under a Generalized Linear Mixed Model. *Hum Hered* 79:60-68.
- Yao J, Zhang KX, Kramer M, Pellegrini M, McCombie WR (2014) FamAnn: an automated variant annotation pipeline to facilitate target discovery for family-based sequencing studies. *Bioinformatics* 30:1175-1176.
- Zhan X, Hu Y, Abecasis GR, Liu DJ (2016) RVTESTS: an efficient and comprehensive tool for rare variant association analysis using sequencing data. *Bioinformatics* 32:1423-1426.
- Zhou X, Stephens M (2012) Genome-wide efficient mixed-model analysis for association studies. *Nat Genet* 44: 821-824.
- Zhu Y, Xiong M (2012) Family-based association studies for next-generation sequencing. *Am J Hum Genet.* 90:1028–1045.
